# Supplementary material for: High-quality draft genome sequences of five anaerobic oral bacteria and description of Peptoanaerobacter stomatis gen. nov., sp. nov., a new member of the family Peptostreptococcaceae
Source: PubMed Central journal article supplement (PMC4517659; doi:10.1186/s40793-015-0027-8), 2015-07-18
Supplement: 40793_2015_27_MOESM1_ESM.pdf [file 40793_2015_27_MOESM1_ESM.pdf]

Table S1. Associated MIGS records of *Peptostreptococcaceae* spp. ACC19a, CM2, CM5, OBRC8, and AS15.

| MIGS ID | field name                     | description                      |                               |                               |                                 |                                     |
|---------|--------------------------------|----------------------------------|-------------------------------|-------------------------------|---------------------------------|-------------------------------------|
|         |                                | strain ACC19a                    | strain CM2                    | strain CM5                    | strain OBRC8                    | strain AS15                         |
| MIGS-1  | Submit to INSDC/Trace archives |                                  |                               |                               |                                 |                                     |
| 1.1     | PID                            | 49887                            | 49889                         | 49891                         | 78565                           | 78563                               |
| 1.2     | GCAT_ID                        | 007931_GCAT                      | 007932_GCAT                   | 007930_GCAT                   | 010963_GCAT                     | 010962_GCAT                         |
|         | NCBI Taxon ID                  | 796937                           | 796939                        | 796940                        | 796941                          | 1115804                             |
|         | Genome Data                    | AFZE00000000                     | AFZF00000000                  | AFZG00000000                  | ALNK00000000                    | ALJM00000000                        |
|         | HMP_ID                         | 9629                             | 9630                          | 9628                          | 1143                            | 1142                                |
|         | HOMD ID                        | HOMD: tax_081                    | HOMD: tax_081                 | HOMD: tax_081                 | HOMD: tax_081                   | HOMD: tax_377                       |
|         | IMG Object ID                  | 2513237269                       | 2562617100                    | 2513237271                    | 2531839269                      | 2537561888                          |
| MIGS-2  | MIGS CHECK LIST TYPE           |                                  |                               |                               |                                 |                                     |
|         | Domain                         | Bacteria                         | Bacteria                      | Bacteria                      | Bacteria                        | Bacteria                            |
|         | Phylum                         | Firmicutes                       | Firmicutes                    | Firmicutes                    | Firmicutes                      | Firmicutes                          |
|         | Class                          | Clostridia                       | Clostridia                    | Clostridia                    | Clostridia                      | Clostridia                          |
|         | Order                          | Clostridiales                    | Clostridiales                 | Clostridiales                 | Clostridiales                   | Clostridiales                       |
|         | Family                         | Peptostreptococcaceae            | Peptostreptococcaceae         | Peptostreptococcaceae         | Peptostreptococcaceae           | Peptostreptococcaceae               |
| MIGS-3  | Project Name                   | Peptostreptococcaceae sp. ACC19a | Peptostreptococcaceae sp. CM2 | Peptostreptococcaceae sp. CM5 | Peptostreptococcaceae sp. OBRC8 | Peptostreptococcaceae sp. AS15      |
|         | Genus                          | unclassified                     | unclassified                  | unclassified                  | unclassified                    | [ <i>Eubacterium</i> ]              |
|         | Species                        | unclassified                     | unclassified                  | unclassified                  | unclassified                    | [ <i>Eubacterium</i> ] <i>yurii</i> |
|         | Subspecies                     | unclassified                     | unclassified                  | unclassified                  | unclassified                    | <i>margaretiae</i>                  |
|         | Strain                         | ACC19a                           | CM2                           | CM5                           | OBRC8                           | AS15                                |
|         | NCBI status                    | complete                         | complete                      | complete                      | complete                        | complete                            |
| MIGS-4  | Geographic Location            | Boston, MA, USA                  | Boston, MA, USA               | Boston, MA, USA               | Boston, MA, USA                 | Boston, MA, USA                     |
| 4.1     | Latitude                       | 42° 21' N                        | 42° 21' N                     | 42° 21' N                     | 42° 21' N                       | 42° 21' N                           |
| 4.2     | Longitude                      | 71° 03' W                        | 71° 03' W                     | 71° 03' W                     | 71° 03' W                       | 71° 03' W                           |
| 4.4     | Altitude                       | 43 m                             | 43 m                          | 43 m                          | 43 m                            | 43 m                                |
| 4.5     | Isolation Site                 | Human oral cavity                | Human oral cavity             | Human oral cavity             | Human oral cavity               | Human oral cavity                   |
| 4.6     | Isolation                      | USA                              | USA                           | USA                           | USA                             | USA                                 |

|         | Country                           |                                |                                |                                |                                |                                |
|---------|-----------------------------------|--------------------------------|--------------------------------|--------------------------------|--------------------------------|--------------------------------|
|         | Isolation Source                  | Maria Sizova and Slava Epstein | Maria Sizova and Slava Epstein | Maria Sizova and Slava Epstein | Maria Sizova and Slava Epstein | Maria Sizova and Slava Epstein |
| MIGS-5  | Sample Collection Date            | March 2010                     | March 2010                     | March 2010                     | March 2010                     | March 2010                     |
| MIGS-6  | Habitat                           | Human oral cavity              | Human oral cavity              | Human oral cavity              | Human oral cavity              | Human oral cavity              |
| 6.1     | temperature                       | 37° C                          | 37° C                          | 37° C                          | 37° C                          | 37° C                          |
| 6.2     | pH                                | Neutral                        | Neutral                        | Neutral                        | Neutral                        | Neutral                        |
| 6.3     | salinity                          | Normal                         | Normal                         | Normal                         | Normal                         | Normal                         |
| MIGS-7  | Subspecific genetic lineage       | not reported                   | not reported                   | not reported                   | not reported                   | not reported                   |
| MIGS-9  | Number of replicons               | 1                              | 1                              | 1                              | 1                              | 1                              |
| MIGS-10 | Plasmid Count                     | 0                              | 0                              | 0                              | 0                              | 0                              |
| MIGS-11 | Estimated Size                    | 2542 kb                        | 2313 kb                        | 2594 kb                        | 2553 kb                        | 2655 kb                        |
|         | ORFS                              | 2331                           | 2030                           | 2379                           | 2313                           | 2336                           |
|         | Chromosome Count                  | 1                              | 1                              | 1                              | 1                              | 1                              |
| MIGS-12 | Isolation Pubmed ID               | PMID: 22057871                 | PMID: 22057871                 | PMID: 22057871                 | PMID: 22057871                 | PMID: 22057871                 |
| MIGS-13 | Culture Collection                | BEI HM-483                     | BEI HM-484                     | BEI HM-485                     | BEI HM-765                     | BEI HM-766                     |
|         | Goldstamp Publication             | Gi06852<br>PMID: 22057871      | Gi06853<br>PMID: 22057871      | Gi06851<br>PMID: 22057871      | Gi09663<br>PMID: 22057871      | Gi09662<br>PMID: 22057871      |
| MIGS-14 | Pathogenicity                     | not reported                   | not reported                   | not reported                   | not reported                   | not reported                   |
| MIGS-15 | Biotic Relationship               | Commensal                      | Commensal                      | Commensal                      | Commensal                      | Commensal                      |
| MIGS 16 | Host Name                         | Homo sapiens                   | Homo sapiens                   | Homo sapiens                   | Homo sapiens                   | Homo sapiens                   |
|         | Host Taxon ID                     | 9606                           | 9606                           | 9606                           | 9606                           | 9606                           |
|         | Host Gender                       | Female                         | Female                         | Female                         | Female                         | Female                         |
|         | Host Age                          | 25                             | 24                             | 24                             | 21                             | 27                             |
|         | Host Race                         | African-American               | Caucasian                      | Caucasian                      | Caucasian                      | African-American               |
| MIGS-17 | Host specificity or range (taxid) | Oral cavity                    | Oral cavity                    | Oral cavity                    | Oral cavity                    | Oral cavity                    |
|         | Body Sample Site                  | Oral cavity                    | Oral cavity                    | Oral cavity                    | Oral cavity                    | Oral cavity                    |

|         |                                        |                                                                                                                 |                                                                                                                                                                                                                     |                                                                                                                 |                                                                       |                                                                                  |
|---------|----------------------------------------|-----------------------------------------------------------------------------------------------------------------|---------------------------------------------------------------------------------------------------------------------------------------------------------------------------------------------------------------------|-----------------------------------------------------------------------------------------------------------------|-----------------------------------------------------------------------|----------------------------------------------------------------------------------|
|         | Body Product<br>Body Sample<br>Subsite | Dental plaque<br>Subgingival                                                                                    | Dental plaque<br>Subgingival                                                                                                                                                                                        | Dental plaque<br>Subgingival                                                                                    | Dental plaque<br>Subgingival                                          | Dental plaque<br>Subgingival                                                     |
|         | Host Comments                          | not reported                                                                                                    | not reported                                                                                                                                                                                                        | not reported                                                                                                    | not reported                                                          | not reported                                                                     |
| MIGS-18 | Host Health                            | Healthy                                                                                                         | Healthy                                                                                                                                                                                                             | Healthy                                                                                                         | Healthy                                                               | Healthy                                                                          |
| MIGS-19 | Trophic Level                          | Commensal                                                                                                       | Commensal                                                                                                                                                                                                           | Commensal                                                                                                       | Commensal                                                             | Commensal                                                                        |
| MIGS-22 | Relationship to<br>Oxygen              | Strictly anaerobic                                                                                              | Strictly anaerobic                                                                                                                                                                                                  | Strictly anaerobic                                                                                              | Strictly anaerobic                                                    | Strictly anaerobic                                                               |
|         | Carbon Source                          | Yeast extract                                                                                                   | Yeast extract                                                                                                                                                                                                       | Yeast extract,<br>Glucose, Sucrose,<br>Maltose                                                                  | Yeast extract, Glucose,<br>Sucrose, Maltose                           | Yeast extract,<br>Glucose, Sucrose,<br>Maltose                                   |
| MIGS-23 | Isolation and<br>Growth<br>conditions  | PMID: 22057871                                                                                                  | PMID: 22057871                                                                                                                                                                                                      | PMID: 22057871                                                                                                  | PMID: 22057871                                                        | PMID: 22057871                                                                   |
| MIGS 28 | Library<br>construction                | Two 454<br>pyrosequencing<br>libraries: one standard<br>0.6kb fragment library<br>and one 2.5kb jump<br>library | Two 454<br>pyrosequencing<br>libraries: one standard<br>0.6kb fragment library<br>and one 2.5kb jump<br>library. Two Illumina<br>libraries: one standard<br>180bp fragment<br>library and one 3-5kb<br>jump library | Two 454<br>pyrosequencing<br>libraries: one standard<br>0.6kb fragment library<br>and one 2.5kb jump<br>library | Standard Paired End<br>Illumina library<br>generated for<br>HiSEQ2000 | Standard Paired End<br>Illumina library<br>generated for<br>HiSEQ2000            |
| 28.1    | Library Method                         | 0.6kb and 2.5kb                                                                                                 | 0.6kb and 2.5kb<br>180bp and 3-5kb                                                                                                                                                                                  | 0.6kb and 2.5kb                                                                                                 | 0.45 kb paired end<br>library                                         | 0.45 kb paired end<br>library                                                    |
| 28.2    | Reads Count                            | 337046                                                                                                          | 25246427                                                                                                                                                                                                            | 354415                                                                                                          | 7983051                                                               | 865772                                                                           |
| MIGS-29 | Sequencing<br>platforms                | 454                                                                                                             | 454; Illumina HiSeq<br>2000                                                                                                                                                                                         | 454                                                                                                             | Illumina HiSeq 2000                                                   | Illumina HiSeq 2000                                                              |
| MIGS-30 | Assemblers                             | Newbler v. 2.3<br>PostRelease-<br>11/19/2009                                                                    | Newbler v. 2.3<br>PostRelease-<br>11/19/2009 and ALL-<br>PATHS version<br>R39099                                                                                                                                    | Newbler v. 2.3<br>PostRelease-<br>11/19/2009                                                                    | Newbler v. 2.3<br>PostRelease-<br>11/19/2009                          | Newbler v. 2.3<br>PostRelease-<br>11/19/2009 and ALL-<br>PATHS version<br>R39099 |
| 30.2    | estimated error<br>rate                | less than 1 in 10,000<br>bp                                                                                     | less than 1 in<br>1,000,000 bp                                                                                                                                                                                      | less than 1 in 10,000<br>bp                                                                                     | Less than 3%                                                          | Less than 3%                                                                     |

|         |                       |                                |                                |                                |                                                     |                                                     |
|---------|-----------------------|--------------------------------|--------------------------------|--------------------------------|-----------------------------------------------------|-----------------------------------------------------|
| 30.3    | method of calculation |                                |                                |                                | utgErrorRate calculated value with Celera Assembler | utgErrorRate calculated value with Celera Assembler |
| MIGS-31 | Finishing Quality     | High Quality Draft             | High Quality Draft             | High Quality Draft             | High Quality Draft                                  | High Quality Draft                                  |
| 31.1    | Sequencing Status     | Complete                       | Complete                       | Complete                       | Complete                                            | Complete                                            |
|         | Sequencing Quality    | Level 2: High-Quality Draft    | Level 2: High-Quality Draft    | Level 2: High-Quality Draft    | Level 2: High-Quality Draft                         | Level 2: High-Quality Draft                         |
| 31.2    | Fold Coverage         | 40×                            | 282×                           | 39×                            | 32×                                                 | 31×                                                 |
| 31.3    | Contig Count          | 59                             | 19                             | 106                            | 40                                                  | 52                                                  |
| MIGS-32 | Relevant SOPs         | not reported                   | not reported                   | not reported                   | not reported                                        | not reported                                        |
| MIGS-33 | Genome Database       | Human Microbiome Project (HMP) | Human Microbiome Project (HMP) | Human Microbiome Project (HMP) | Human Microbiome Project (HMP)                      | Human Microbiome Project (HMP)                      |
| MIGS-34 | Gene calling Method   | PRODIGAL                       | PRODIGAL                       | PRODIGAL                       | GLIMMER                                             | GLIMMER                                             |
| MIGS-35 | GC Content            | 30%                            | 30%                            | 30%                            | 31%                                                 | 32%                                                 |
| MIGS-36 | Project Status        | Complete                       | Complete                       | Complete                       | Complete                                            | Complete                                            |
|         | Availability          | Public                         | Public                         | Public                         | Public                                              | Public                                              |
|         | Sequencing Centers    | Broad Institute                | Broad Institute                | Broad Institute                | JCVI                                                | JCVI                                                |
|         | Funding               | NIH                            | NIH                            | NIH                            | NIH                                                 | NIH                                                 |
|         | Contact Name          | Broad Institute                | Broad Institute                | Broad Institute                | JCVI                                                | JCVI                                                |
| MIGS-37 |                       |                                |                                |                                |                                                     |                                                     |
| 37.1    | Cell Shape            | Rods with round ends           | Rods with round ends           | Rods with round ends           | Rods with round ends                                | Rods with square ends                               |
| 37.2    | Motility              | Motile                         | Motile                         | Motile                         | Motile                                              | Motile                                              |
| 37.3    | Sporuation            | Non-sporulating                | Non-sporulating                | Non-sporulating                | Non-sporulating                                     | Non-sporulating                                     |
| 37.4    | Pressure              | atmospheric                    | atmospheric                    | atmospheric                    | atmospheric                                         | atmospheric                                         |
| 37.5    | Cell Diameter (um)    | 0.4 - 0.8                      | 0.5 - 0.7                      | 0.5 - 0.7                      | 0.6 - 0.8                                           | 0.4 - 0.5                                           |
| 37.6    | Cell Length (um)      | 1.2 - 2.5                      | 1.0 - 2.3                      | 1.3 - 2.7                      | 1.4 - 3.5                                           | 1.5 - 4.7                                           |
| 37.7    | Color                 | not reported                   | not reported                   | not reported                   | not reported                                        | not reported                                        |

|                |                   |                                  |                                  |                                  |                                  |                                    |
|----------------|-------------------|----------------------------------|----------------------------------|----------------------------------|----------------------------------|------------------------------------|
| 37.8           | Gram Staining     | Gram-positive                    | Gram-positive                    | Gram-positive                    | Gram-positive                    | Gram-positive                      |
| 37.9           | Cell arrangement  | individual cells, some in chains | individual cells, some in chains | individual cells, some in chains | individual cells, some in chains | individual cells, some in rosettes |
|                | Disease           | Unknown                          | Unknown                          | Unknown                          | Unknown                          | Unknown                            |
| 37.10          | Metabolism        | acetate and propionate producer  | acetate and propionate producer  | acetate and propionate producer  | not reported                     | not reported                       |
| 37.12          | Temperature Range | Mesophile                        | Mesophile                        | Mesophile                        | Mesophile                        | Mesophile                          |
| <b>MIGS-38</b> |                   |                                  |                                  |                                  |                                  |                                    |
| 38.1           | Contact Name      | Ashlee Earl                      | Ashlee Earl                      | Ashlee Earl                      | Manolito Torralba                | Manolito Torralba                  |
| 38.2           | Contact email     | hmpstrainsbroad@broad.mit.edu    | hmpstrainsbroad@broad.mit.edu    | hmpstrainsbroad@broad.mit.edu    | hmpstrains@jcv.org               | hmpstrains@jcv.org                 |
|                | Locus Tag         | HMPREF9629                       | HMPREF9630                       | HMPREF9628                       | HMPREF1143                       | HMPREF1142                         |
|                | Completion Date   | 2014-01-09                       | 2014-01-09                       | 2014-01-09                       | 2012-08-27                       | 2014-01-05                         |
|                | Publication       | PMID: 22057871                   | PMID: 22057871                   | PMID: 22057871                   | PMID: 22057871                   | PMID: 22057871                     |
|                | Project Relevance | Human Microbiome Project (HMP)   | Human Microbiome Project (HMP)   | Human Microbiome Project (HMP)   | Human Microbiome Project (HMP)   | Human Microbiome Project (HMP)     |
